# Supplementary material for: Septic Tibial Nonunions on Proximal and Distal Metaphysis—A Systematic Narrative Review
Source: MDPI journal article supplement (doi:10.3390/biomedicines11061665), 2023-06-08
Supplement: s1 [file s1]

| Patient | Sex | Age | Time from to presentation (months) | Number of previous surgeries | Tibial Region | Microbe                | Treatment Method (mode)                    | Bone Graft | Plastic Flap | Days to union | Months to Final Follow-up | Complications                         | Results   | Preop LLD (cm shortening of the affected limb) | Postop LLD (cm shortening of the affected limb) |
|---------|-----|-----|------------------------------------|------------------------------|---------------|------------------------|--------------------------------------------|------------|--------------|---------------|---------------------------|---------------------------------------|-----------|------------------------------------------------|-------------------------------------------------|
| Br.1    | M   | 61  | 3                                  | 1                            | Distal        | Staph. Aureus          | Gradual Deformity correction + Compression | Autograft  | None         | 432           | 47                        | Cellulitis                            | Excellent | Unknown                                        | Unknown                                         |
| Br.2    | F   | 65  | 3                                  | 2                            | Distal        | Staph. Aureus          | Compression                                | None       | None         | 90 (Death)    | Death                     | Death                                 | Death     | Unknown                                        | Unknown                                         |
| Br.3    | F   | 65  | 11                                 | 5                            | Distal        | Staph. Aureus          | Bone Transport                             | Autograft  | None         | 427           | 19                        | None                                  | Fair      | Unknown                                        | Unknown                                         |
| Br.4    | F   | 67  | 37                                 | 6                            | Distal        | Staph. Aureus          | Gradual Deformity correction + Compression | Autograft  | None         | 283           | 61                        | Pin site infection                    | Good      | Unknown                                        | Unknown                                         |
| Br.5    | M   | 70  | 10                                 | 1                            | Distal        | Staph. Aureus          | Gradual Deformity correction + Compression | Autograft  | None         | 217           | 43                        | Cellulitis                            | Very good | Unknown                                        | Unknown                                         |
| Br.6    | M   | 77  | 25                                 | 2                            | Distal        | Staph. Aureus          | Bone Transport + tibial/calcaneal fusion   | Autograft  | None         | 587           | 35                        | None                                  | Good      | Unknown                                        | Unknown                                         |
| Br.7    | F   | 78  | 11                                 | 1                            | Distal        | Staph. Hominis Hominis | Gradual Deformity correction + Compression | Autograft  | None         | 239           | 31                        | None                                  | Good      | Unknown                                        | Unknown                                         |
| Er.1    | M   | 43  |                                    |                              | Distal        | Inconclusive           | Gradual Deformity correction + Compression |            |              | 270           | 20                        | Pin site Infection                    | Excellent | 1                                              | 3                                               |
| Er.2    | M   | 46  |                                    |                              | Distal        | Inconclusive           | Bone Transport                             |            |              | 150           | 39                        | Pin site Infection, Equinus Deformity | Good      | 2                                              | 0                                               |

|       |   |    |    |   |        |              |                                                         |  |  |     |    |                                                        |           |   |   |
|-------|---|----|----|---|--------|--------------|---------------------------------------------------------|--|--|-----|----|--------------------------------------------------------|-----------|---|---|
| Er.3  | M | 63 |    |   | Distal | Inconclusive | Gradual Deformity correction + Compression, Arthrodesis |  |  | 210 | 20 | Pin site Infection, Ankle Stiffness                    | Good      | 1 | 2 |
| Er.4  | M | 35 |    |   | Distal | Inconclusive | Gradual Deformity correction + Compression              |  |  | 210 | 36 | Pin site Infection, Equinus Deformity, Ankle Stiffness | Good      | 2 | 3 |
| Er.5  | M | 71 |    |   | Distal | Inconclusive | Ankle Arthrodesis (Combined Technique)                  |  |  | 135 | 63 | Pin site Infection, Equinus Deformity, Knee Stiffness  | Good      | 0 | 0 |
| Er.6  | M | 53 |    |   | Distal | Inconclusive | Bone Transport                                          |  |  | 300 | 18 | None                                                   | Excellent | 4 | 0 |
| Er.7  | M | 66 |    |   | Distal | Inconclusive | Compression                                             |  |  | 120 | 16 | None                                                   | Good      | 0 | 0 |
| Er.8  | F | 79 |    |   | Distal | Inconclusive | Bone Transport                                          |  |  | 255 | 36 | None                                                   | Good      | 1 | 1 |
| Er.9  | M | 41 |    |   | Distal | Inconclusive | Bone Transport                                          |  |  | 200 | 24 | Pin site infection, malalignment >5                    | Fair      | 2 | 2 |
| Er.10 | F | 38 |    |   | Distal | Inconclusive | Ankle arthrodesis (Taylor Spatial Frame)                |  |  | 270 | 51 | Revision ankle retrograde IMN                          | Fair      | 2 | 4 |
| Er.11 | F | 28 |    |   | Distal | Inconclusive | Pantalar Arthrodesis (Combined Technique)               |  |  | 165 | 70 | None                                                   | Excellent | 0 | 0 |
| Er.12 | F | 33 |    |   | Distal | Inconclusive | Bone Transport                                          |  |  | 180 | 18 | Pin site Infection                                     | Excellent | 1 | 0 |
| Er.13 | M | 66 |    |   | Distal | Inconclusive | Compression+ Arthrodesis                                |  |  | 120 | 60 | None                                                   | Excellent | 1 | 1 |
| Ln.1  | F | 38 | 21 | 3 | Distal | Inconclusive | Compression+ Arthrodesis                                |  |  | 165 | 34 |                                                        | Poor      | 5 | 4 |

|             |   |    |    |    |        |              |                                                                                      |      |    |     |    |                       |           |     |     |
|-------------|---|----|----|----|--------|--------------|--------------------------------------------------------------------------------------|------|----|-----|----|-----------------------|-----------|-----|-----|
| <b>Ln.2</b> | M | 55 | 14 | 10 | Distal | Inconclusive | Compression                                                                          |      |    | 188 | 60 |                       | Good      | 6   | 0   |
| <b>Ln.3</b> | M | 41 | 5  | 4  | Distal | Inconclusive | Resection+<br>Compression                                                            |      |    | 138 | 45 |                       | Excellent | 2,5 | 2   |
| <b>Ln.4</b> | M | 40 | 25 | 4  | Distal | Inconclusive | Resection+<br>Compression                                                            |      |    | 224 | 60 |                       | Excellent | 3   | 1   |
| <b>Ln.5</b> | M | 62 | 60 | 13 | Distal | Inconclusive | Compression+<br>Arthrodesis                                                          |      |    | 307 | 27 |                       | Excellent | 4   | 1   |
| <b>Ln.6</b> | F | 23 | 48 | 9  | Distal | Inconclusive | Resection+<br>Compression                                                            |      |    | 218 | 72 |                       | Excellent | 3   | 0   |
| <b>Me.1</b> | F | 33 | 5  | 1  |        | Inconclusive | Ilizarov 4<br>circles of<br>distraction and<br>compression<br>without<br>debridement | None | No | 21w | 38 | Pin site<br>infection | Excellent | 0   | 0   |
| <b>Me.2</b> | F | 27 | 6  | 1  |        | Inconclusive | Ilizarov 4<br>circles of<br>distraction and<br>compression<br>without<br>debridement | None | No | 26w | 26 | Pin site<br>infection | Excellent | 0   | 0   |
| <b>Me.3</b> | M | 25 | 5  | 1  |        | Inconclusive | Ilizarov 4<br>circles of<br>distraction and<br>compression<br>without<br>debridement | None | No | 25w | 25 | Pin site<br>infection | Excellent | 0   | 0   |
| <b>Me.4</b> | M | 20 | 6  | 1  |        | Inconclusive | Ilizarov 4<br>circles of<br>distraction and<br>compression<br>without<br>debridement | None | No | 22w | 24 | None                  | Poor      | 0   | 2,5 |
| <b>Me.5</b> | M | 22 | 6  | 1  |        | Inconclusive | Ilizarov 4<br>circles of<br>distraction and<br>compression                           | None | No | 22w | 25 | Pin site<br>infection | Excellent | 0   | 0,5 |

|              |   |    |              |              |          |                                                           |                                                                       |                                      |    |                              |              |                   |              |              |              |     |
|--------------|---|----|--------------|--------------|----------|-----------------------------------------------------------|-----------------------------------------------------------------------|--------------------------------------|----|------------------------------|--------------|-------------------|--------------|--------------|--------------|-----|
|              |   |    |              |              |          |                                                           | without debridement                                                   |                                      |    |                              |              |                   |              |              |              |     |
| <b>Me.6</b>  | M | 24 | 5            | 1            |          | Inconclusive                                              | Ilizarov 4 circles of distraction and compression without debridement | None                                 | No | 24w                          | 27           | None              | Good         | 0            |              | 0,8 |
| <b>Si.1</b>  | F | 67 | Inconclusive | Inconclusive | Distal   | S. epidermidis, S. lugdensis, S. capitis                  | Masquelet, Locking plate                                              | Cancellous iliac crest, allograft    | No | 210                          | Inconclusive | None              | Inconclusive | Inconclusive | Inconclusive |     |
| <b>Si.2</b>  | F | 65 | Inconclusive | Inconclusive | Proximal | S. epidermidis                                            | Masquelet, Locking plate                                              | Cancellous iliac crest, allograft    | No | 120                          | Inconclusive | None              | Inconclusive | Inconclusive | Inconclusive |     |
| <b>Si.3</b>  | F | 88 | Inconclusive | Inconclusive | Distal   | S. warneri, S. epidermidis, MSSA, S. hominis              | Masquelet, Locking plate                                              | Cancellous iliac crest               | No | 510                          | Inconclusive | None              | Inconclusive | Inconclusive | Inconclusive |     |
| <b>Si.4</b>  | M | 24 | Inconclusive | Inconclusive | Distal   | MRSA                                                      | Masquelet, Locking plate                                              | Cancellous iliac crest, allograft    | No | 150                          | Inconclusive | None              | Inconclusive | Inconclusive | Inconclusive |     |
| <b>Si.5</b>  | F | 78 | Inconclusive | Inconclusive | Distal   | MSSA                                                      | Masquelet, Locking plate                                              | Cortical iliac crest, Allograft      | No | 180                          | Inconclusive | None              | Inconclusive | Inconclusive | Inconclusive |     |
| <b>Si.6</b>  | M | 52 | Inconclusive | Inconclusive | Distal   | Strep agalactiae, S. epidermidis, S. simulans, E. cloacae | Masquelet, Plaster cast                                               | Cancellous Iliac crest, femoral head | No | 960                          | Inconclusive | None              | Inconclusive | Inconclusive | Inconclusive |     |
| <b>Si.7</b>  | M | 64 | Inconclusive | Inconclusive | Distal   | MSSA                                                      | Masquelet, Locking plate                                              | Cancellous iliac crest, allograft    | No | Revision and union after 300 | Inconclusive | Infection persist | Inconclusive | Inconclusive | Inconclusive |     |
| <b>Si.8</b>  | M | 49 | Inconclusive | Inconclusive | Distal   | MSSA                                                      | Masquelet, Locking plate                                              | Cancellous iliac crest               | No | Revision and union after 480 | Inconclusive | Infection Persist | Inconclusive | Inconclusive | Inconclusive |     |
| <b>Si.9</b>  | M | 50 | Inconclusive | Inconclusive | Distal   | S. epidermidis, S. auricularis                            | Masquelet, Plaster cast                                               | Cancellous iliac crest               | No | amputation                   | Inconclusive | Amputation        | Inconclusive | Inconclusive | Inconclusive |     |
| <b>Si.10</b> | M | 49 | Inconclusive | Inconclusive | Distal   | MSSA                                                      | Masquelet, External fixator                                           | Femoral head                         | No | Ankle fusion                 | Inconclusive | Ankle fusion      | Inconclusive | Inconclusive | Inconclusive |     |

|      |   |    |              |   |        |                         |                                                                                                  |      |              |     |    |                                                      |      |     |   |
|------|---|----|--------------|---|--------|-------------------------|--------------------------------------------------------------------------------------------------|------|--------------|-----|----|------------------------------------------------------|------|-----|---|
| Yo.1 | M | 43 | Inconclusive | 5 | Distal | Enterobacter cloacae    | Removal of implants, debridement, 2nd stage Masquelet Tec, Definite plate                        | None | Inconclusive | 52w | 27 | Recurrence of infection debridement and Ilizarov     | Fair | 4,8 | 0 |
| Yo.2 | M | 61 | Inconclusive | 2 | Distal | Acinetobacter baumannii | Removal of implants, debridement, 2nd stage Masquelet Tec, Intramedullary nail & augmented plate | None | Inconclusive | 24w | 24 | Soft tissue defect, muscle flap, Intramedullary nail | Good | 5,2 | 0 |
| Yo.3 | M | 61 | Inconclusive | 1 | Distal | MRSA                    | Removal of implants, debridement, 2nd stage Masquelet Tec, Intramedullary nail & augmented plate | None | Inconclusive | 16w | 12 | None                                                 | Good | 5,9 | 0 |
| Yo.4 | F | 40 | Inconclusive | 1 | Distal | Acinetobacter baumannii | Removal of implants, debridement, 2nd stage Masquelet Tec, Intramedullary nail & augmented plate | None | Inconclusive | 16w | 28 | None                                                 | Good | 4,5 | 0 |
| Yo.5 | M | 50 | Inconclusive | 3 | Distal | MRSA                    | Removal of implants,                                                                             | None | Inconclusive | 35w | 15 | None                                                 | Good | 3,2 | 0 |

|      |   |    |              |   |          |                                                                                           |                                                                                                                             |         |              |     |    |                                                                                          |           |      |   |  |
|------|---|----|--------------|---|----------|-------------------------------------------------------------------------------------------|-----------------------------------------------------------------------------------------------------------------------------|---------|--------------|-----|----|------------------------------------------------------------------------------------------|-----------|------|---|--|
|      |   |    |              |   |          |                                                                                           | debridement,<br>2nd stage<br>Masquelet<br>Tec,<br>Intramedullary<br>nail &<br>augmented<br>plate                            |         |              |     |    |                                                                                          |           |      |   |  |
| Yo.6 | M | 68 | Inconclusive | 1 | Proximal | Acinetobacter<br>baumanii,<br>Enterobacter<br>cloacae,<br>Stenotrophomonas<br>maltophilia | Removal of<br>implants,<br>debridement,<br>2nd stage<br>Masquelet<br>Tec, Definite<br>plate                                 | None    | Inconclusive | 20w | 30 | None                                                                                     | Excellent | 5,6  | 0 |  |
| Yo.7 | M | 64 | Inconclusive | 2 | Distal   | MSSA                                                                                      | Removal of<br>implants,<br>debridement,<br>2nd stage<br>Masquelet<br>Tec, Definite<br>intramedullary<br>nail                | Massive | Inconclusive | 24w | 37 | None                                                                                     | Good      | 4,1  | 0 |  |
| Yo.8 | M | 33 | Inconclusive | 2 | Distal   | MRSA                                                                                      | Removal of<br>implants,<br>debridement,<br>2nd stage<br>Masquelet<br>Tec,<br>Intramedullary<br>nail &<br>augmented<br>plate | None    | Inconclusive | 20w | 30 | Soft tissue<br>defect, muscle<br>flap,<br>Intramedullary<br>nail &<br>augmented<br>plate | Excellent | 10,2 | 0 |  |
| Yo.9 | M | 36 | Inconclusive | 5 | Distal   | Pseudomonas                                                                               | Removal of<br>implants,<br>debridement,<br>2nd stage<br>Masquelet<br>Tec,                                                   | None    | Inconclusive | 12w | 12 | None                                                                                     | Excellent | 7,8  | 0 |  |

|              |   |    |              |   |          |      |                                                                                             |      |              |     |    |      |           |     |   |  |
|--------------|---|----|--------------|---|----------|------|---------------------------------------------------------------------------------------------|------|--------------|-----|----|------|-----------|-----|---|--|
|              |   |    |              |   |          |      | Intramedullary<br>nail &<br>augmented<br>plate                                              |      |              |     |    |      |           |     |   |  |
|              |   |    |              |   |          |      | Removal of<br>implants,<br>debridement,<br>2nd stage<br>Masquelet<br>Tec, Definite<br>plate |      |              |     |    |      |           |     |   |  |
| <b>Yo.10</b> | M | 59 | Inconclusive | 3 | Proximal | MRSA |                                                                                             | None | Inconclusive | 20w | 24 | None | Excellent | 3,5 | 0 |  |
